# Supplementary material for: Diversified Chaetoglobosins from the Marine-Derived Fungus Emericellopsis sp. SCSIO41202
Source: MDPI journal article supplement (doi:10.3390/molecules27061823), 2022-03-11
Supplement: s1 [file s1]

# Diversified Chaetoglobosins from the marine-derived fungus *Emericellopsis* sp. SCSIO41202

Surun Shao<sup>2</sup>, Xueni Wang<sup>1</sup>, Jianglian She<sup>1</sup>, Han Zhang<sup>2</sup>, Xiaoyan Pang<sup>1</sup>, Xiuping  
Lin<sup>1,3</sup>, Xuefeng Zhou<sup>1,3</sup>, Yonghong Liu<sup>1,3\*</sup>, Yunqiu Li<sup>2\*</sup> and Bin Yang<sup>1,3\*</sup>

<sup>1</sup> CAS Key Laboratory of Tropical Marine Bio-resources and Ecology/Guangdong Key Laboratory of Marine Materia Medica/Innovation Academy of South China Sea Ecology and Environmental Engineering, South China Sea Institute of Oceanology, Chinese Academy of Sciences, Guangzhou 510301, P. R. China; wangxueni@scsio.ac.cn (X.-N.W.); [shejianglian20@mails.ucas.ac.cn](mailto:shejianglian20@mails.ucas.ac.cn) (J.L. S.); [xypang@scsio.ac.cn](mailto:xypang@scsio.ac.cn) (X.-Y.P.); [xiupinglin@scsio.ac.cn](mailto:xiupinglin@scsio.ac.cn) (X.-P.L.); [xfzhou@scsio.ac.cn](mailto:xfzhou@scsio.ac.cn) (X.-F.Z.)

<sup>2</sup> Pharmacy School of Guilin Medical University, Guilin 541004, P. R. China; shaosurun@163.com (S.-R.S.); zhanghanmarc@163.com (H. Z.)

<sup>3</sup> Southern Marine Science and Engineering Guangdong Laboratory (Guangzhou), Guangzhou 511458, China

\* Correspondence: yangbin@scsio.ac.cn (B.Y.); Tel.: +86-20-89023174; leeyq88@126.com (Y.-Q. L.); yonghongliu@scsio.ac.cn (Y.-H.L.)

## Contents of Supporting Information

|                                                                                                     |    |
|-----------------------------------------------------------------------------------------------------|----|
| Figure S1. $^1\text{H}$ NMR of compound <b>1</b> (in $\text{CD}_3\text{OD}$ ) .....                 | 3  |
| Figure S2. $^{13}\text{C}$ NMR of compound <b>1</b> (in $\text{CD}_3\text{OD}$ ) .....              | 3  |
| Figure S3. HSQC of compound <b>1</b> (in $\text{CD}_3\text{OD}$ ) .....                             | 4  |
| Figure S4. HMBC of compound <b>1</b> (in $\text{CD}_3\text{OD}$ ) .....                             | 4  |
| Figure S5. $^1\text{H}$ - $^1\text{H}$ COSY of compound <b>1</b> (in $\text{CD}_3\text{OD}$ ) ..... | 5  |
| Figure S6. NOESY of compound <b>1</b> (in $\text{CD}_3\text{OD}$ ) .....                            | 5  |
| Figure S7. HRESIMS of compound <b>1</b> .....                                                       | 6  |
| Figure S8. UV of compound <b>1</b> .....                                                            | 7  |
| Figure S9. IR of compound <b>1</b> .....                                                            | 8  |
| Figure S10. $^1\text{H}$ NMR of compound <b>2</b> (in $\text{CD}_3\text{OD}$ ) .....                | 8  |
| Figure S11. $^{13}\text{C}$ NMR of compound <b>2</b> (in $\text{CD}_3\text{OD}$ ) .....             | 9  |
| Figure S12. HSQC of compound <b>2</b> (in $\text{CD}_3\text{OD}$ ) .....                            | 9  |
| Figure S13. HMBC of compound <b>2</b> (in $\text{CD}_3\text{OD}$ ) .....                            | 10 |
| Figure S14. NOESY of compound <b>2</b> (in $\text{CD}_3\text{OD}$ ) .....                           | 10 |
| Figure S15. HRESIMS of compound <b>2</b> .....                                                      | 11 |
| Figure S16. UV of compound <b>2</b> .....                                                           | 12 |
| Figure S17. IR of compound <b>2</b> .....                                                           | 13 |
| Figure S18. CD of compounds <b>1</b> and <b>2</b> .....                                             | 13 |
| Figure S19. Molecular docking of chaetoglobosin Fex .....                                           | 14 |
| Figure S20. Molecular docking of chaetoglobosin G .....                                             | 14 |
| Figure S21. Molecular docking of chaetoglobosin Vb .....                                            | 14 |

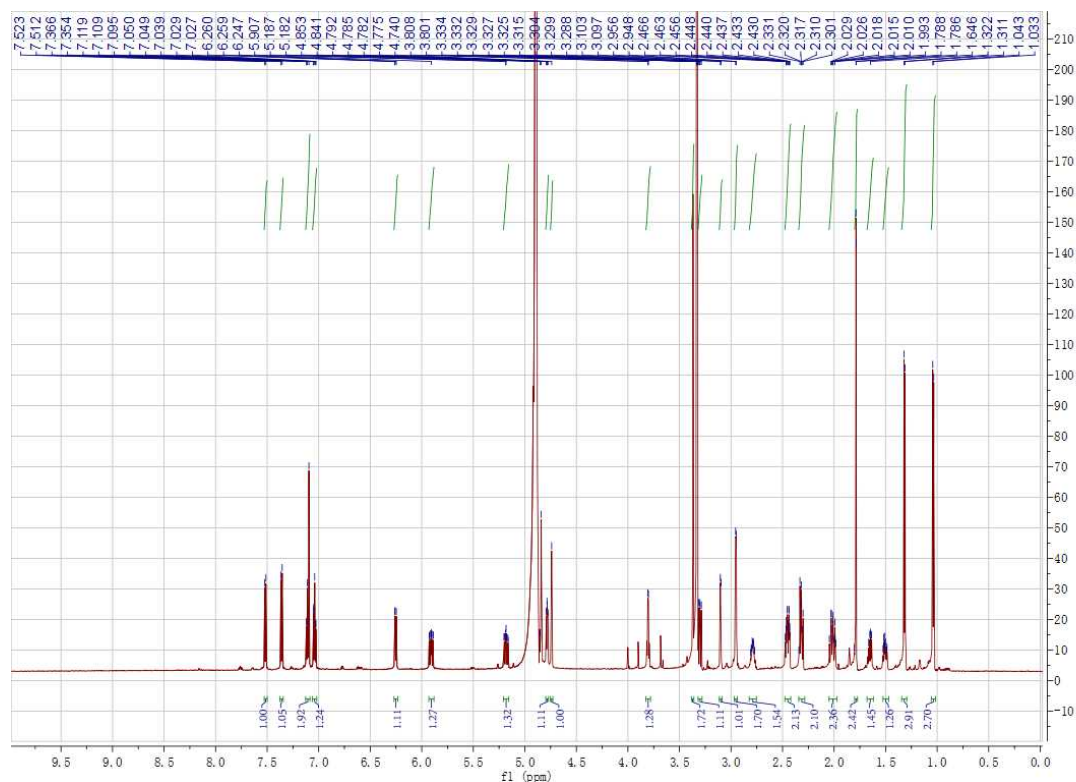

Figure S1. <sup>1</sup>H NMR of compound **1** (in CD<sub>3</sub>OD)

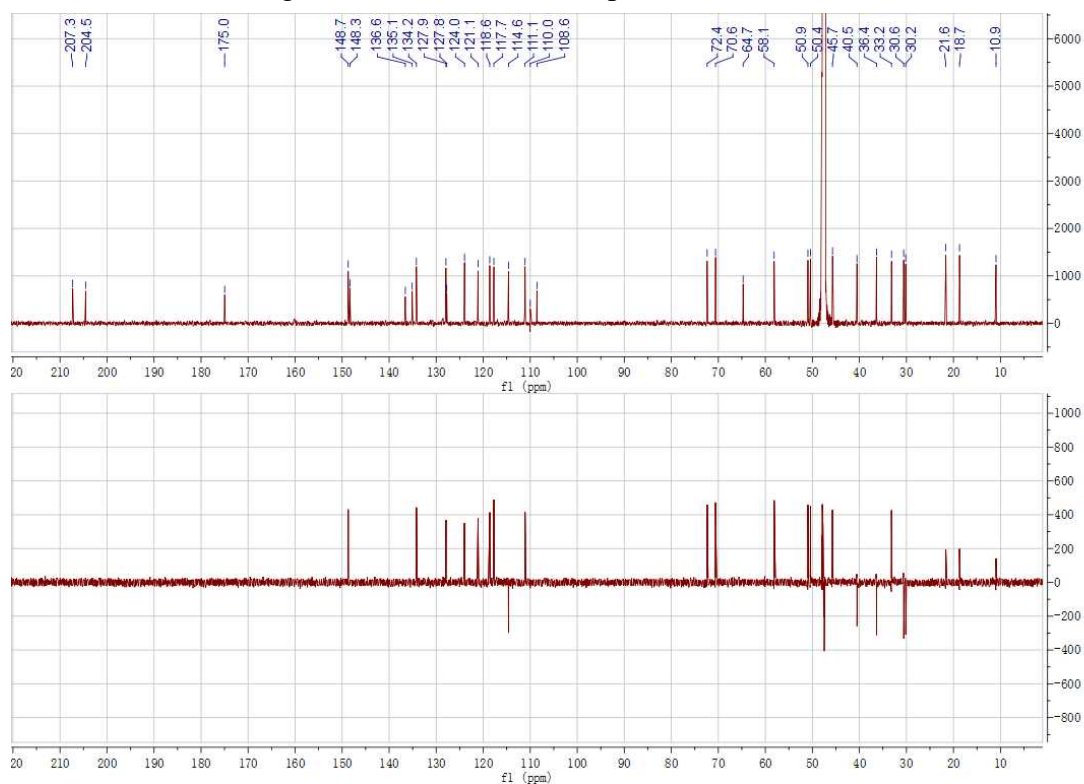

Figure S2. <sup>13</sup>C NMR of compound **1** (in CD<sub>3</sub>OD)

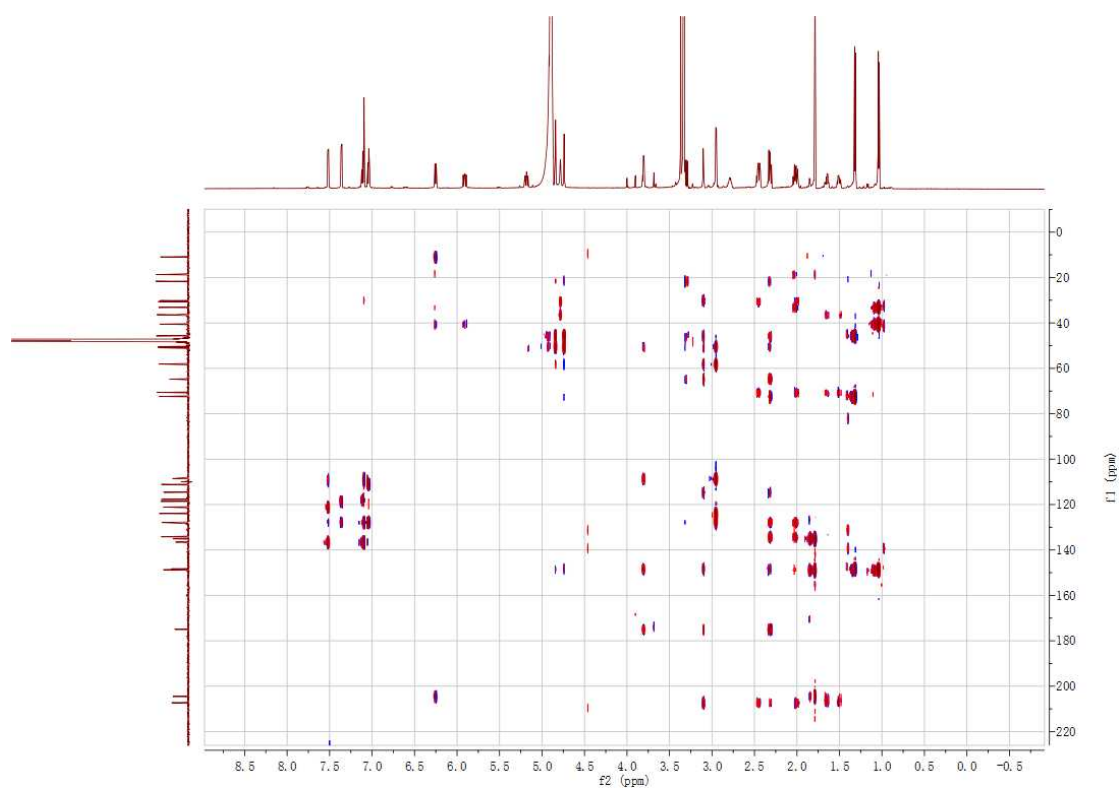

Figure S3. HSQC of compound **1** (in CD<sub>3</sub>OD)

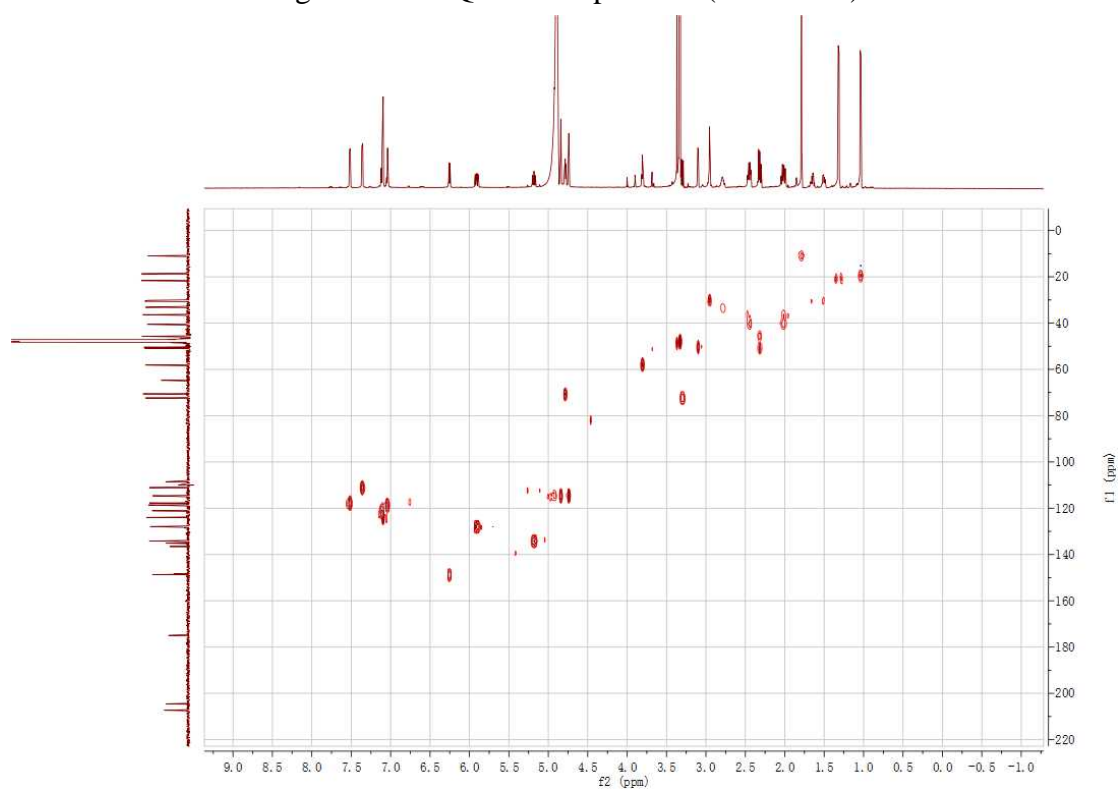

Figure S4. HMBC of compound **1** (in CD<sub>3</sub>OD)

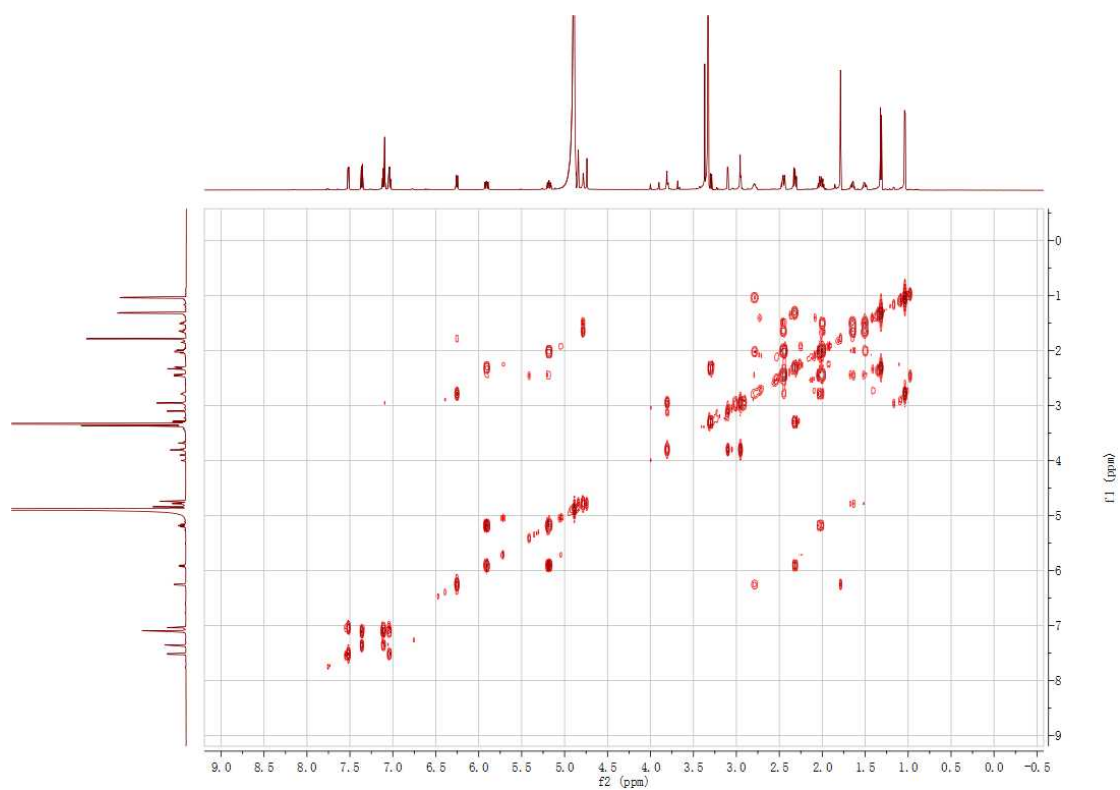

Figure S5.  $^1\text{H}$ - $^1\text{H}$  COSY of compound **1** (in  $\text{CD}_3\text{OD}$ )

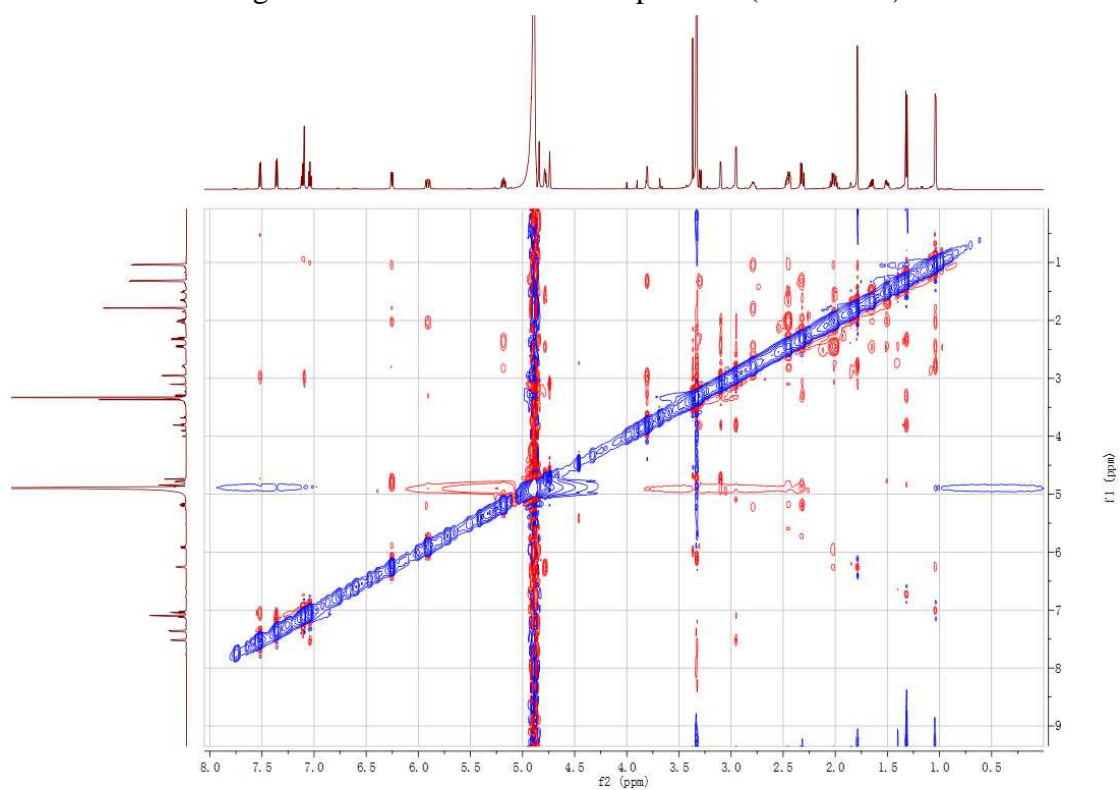

Figure S6. NOESY of compound **1** (in  $\text{CD}_3\text{OD}$ )

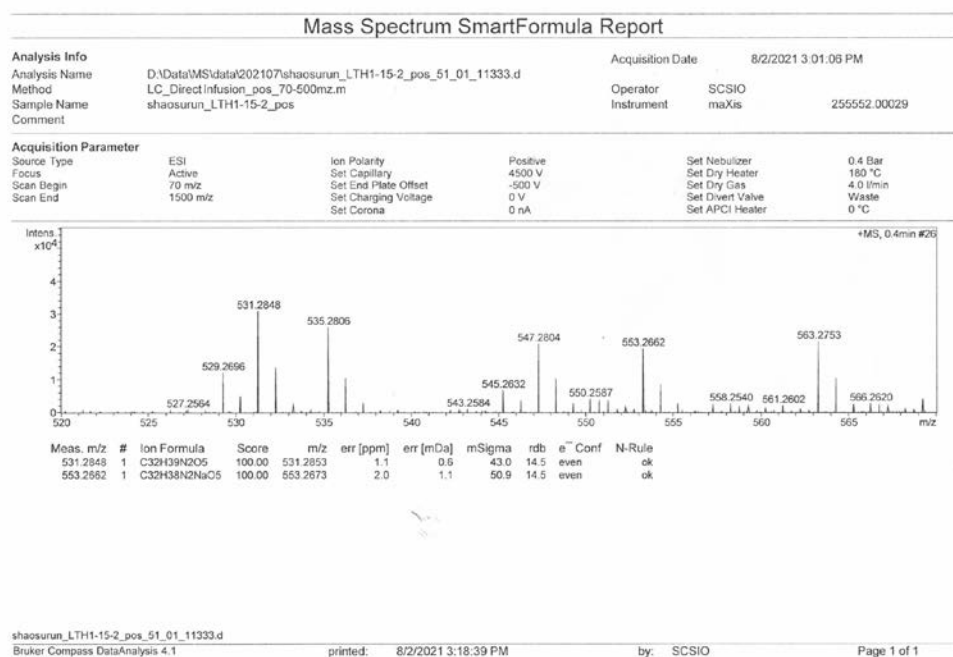

Figure S7. HRESIMS of compound **1**

# 光谱峰值检测报告

2021/07/02 16:43:10

数据集: LTH1-15-2 - RawData

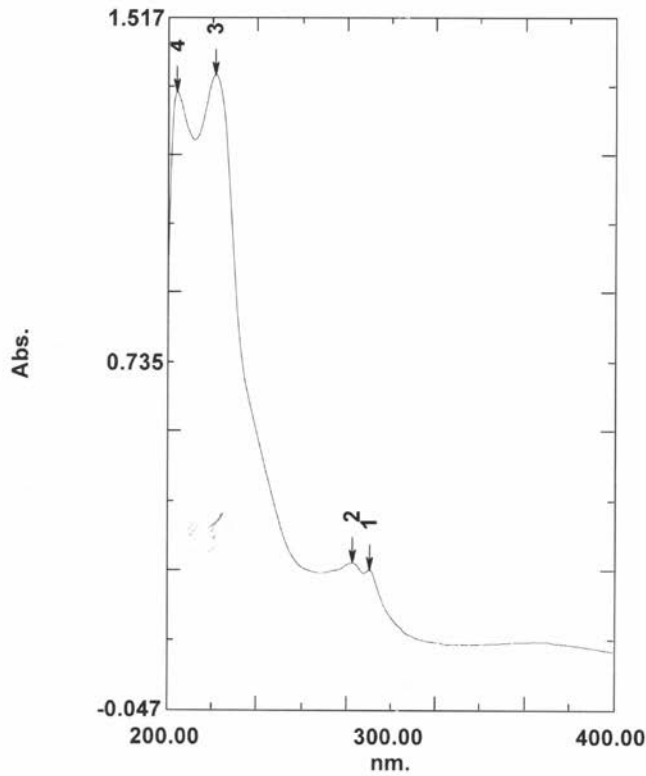

[测定属性]  
波长范围(nm): 200.00 到 400.00  
扫描速度: 中速  
采样间隔: 0.2  
自动采样间隔: 启用  
扫描模式: 单个

[仪器属性]  
仪器类型: UV-2600 系列  
测定方式: 吸收值  
狭缝宽: 2.0  
积分时间: 0.1 秒  
光源转换波长: 323.0 nm  
检测器单元: 直接  
S/R 转换: 标准  
阶梯校正: OFF

[附件属性]  
附件: 无

[数据处理参数]  
阈值: 0.0010000  
点: 4  
内插: 停用  
平均: 停用

[样品准备属性]  
重量:  
体积:  
稀释:  
光程长:  
附加信息:

| No. | P/V | 波长(nm) | Abs.  | 描述 |
|-----|-----|--------|-------|----|
| 1   | ⊕   | 290.20 | 0.267 |    |
| 2   | ⊕   | 282.60 | 0.282 |    |
| 3   | ⊕   | 221.20 | 1.386 |    |
| 4   | ⊕   | 204.00 | 1.346 |    |

Figure S8. UV of compound 1

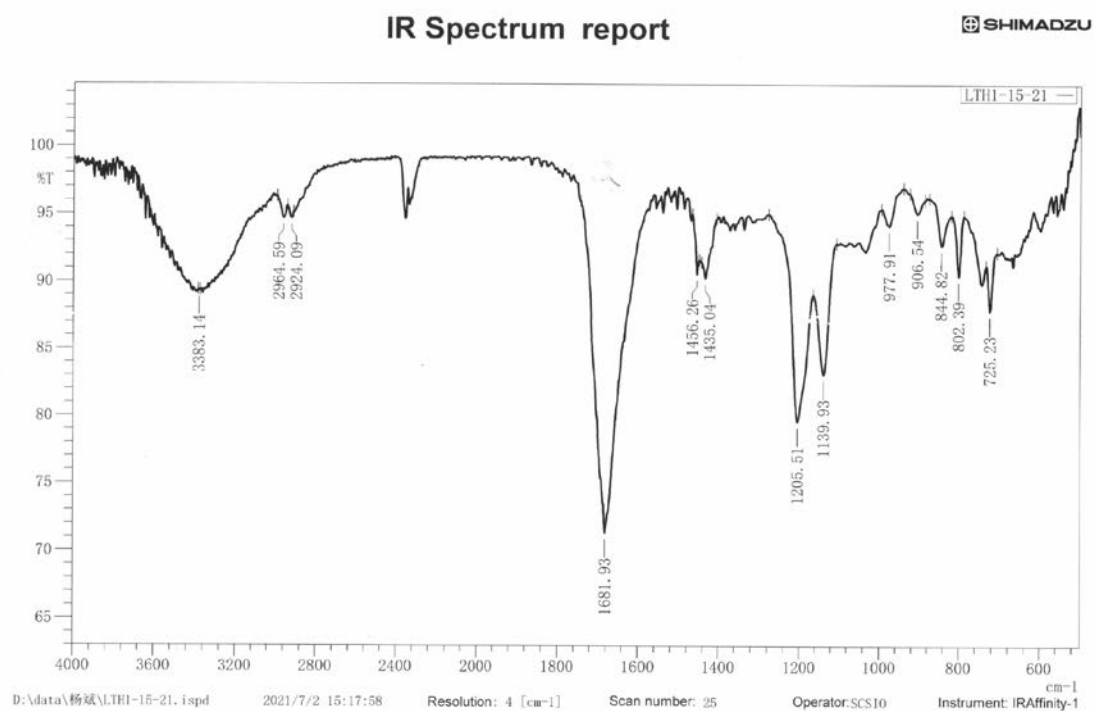

Figure S9. IR of compound **1**

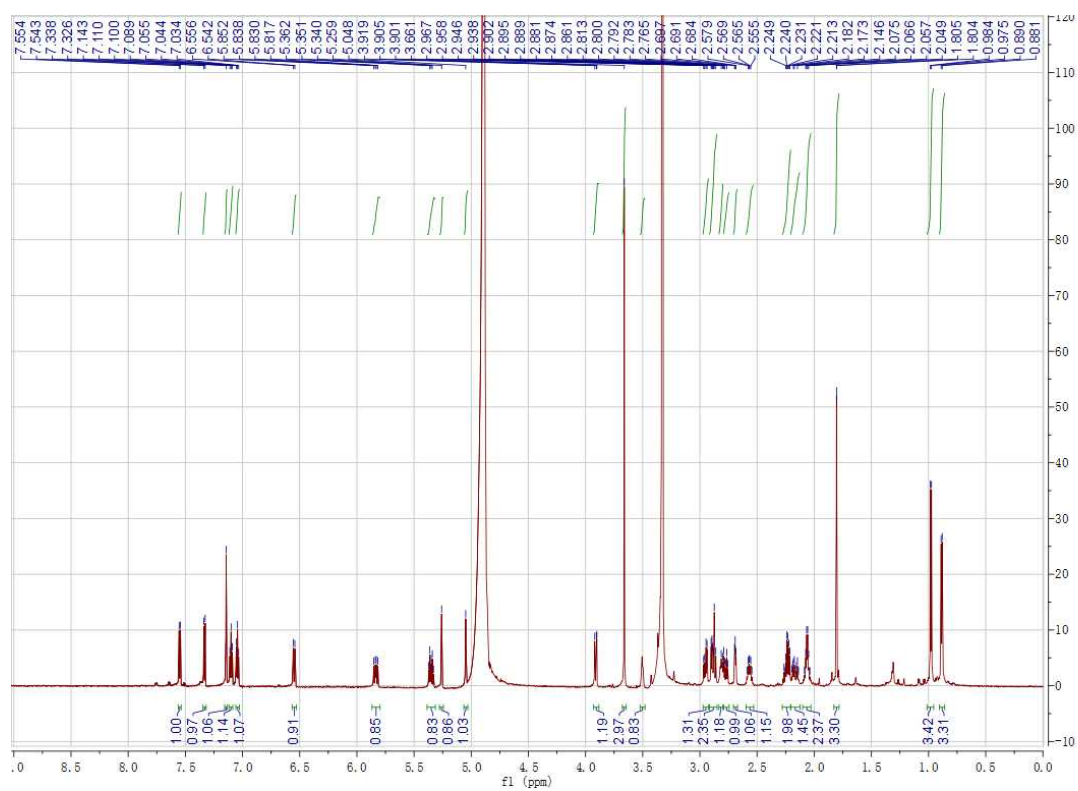

Figure S10. <sup>1</sup>H NMR of compound **2** (in CD<sub>3</sub>OD)



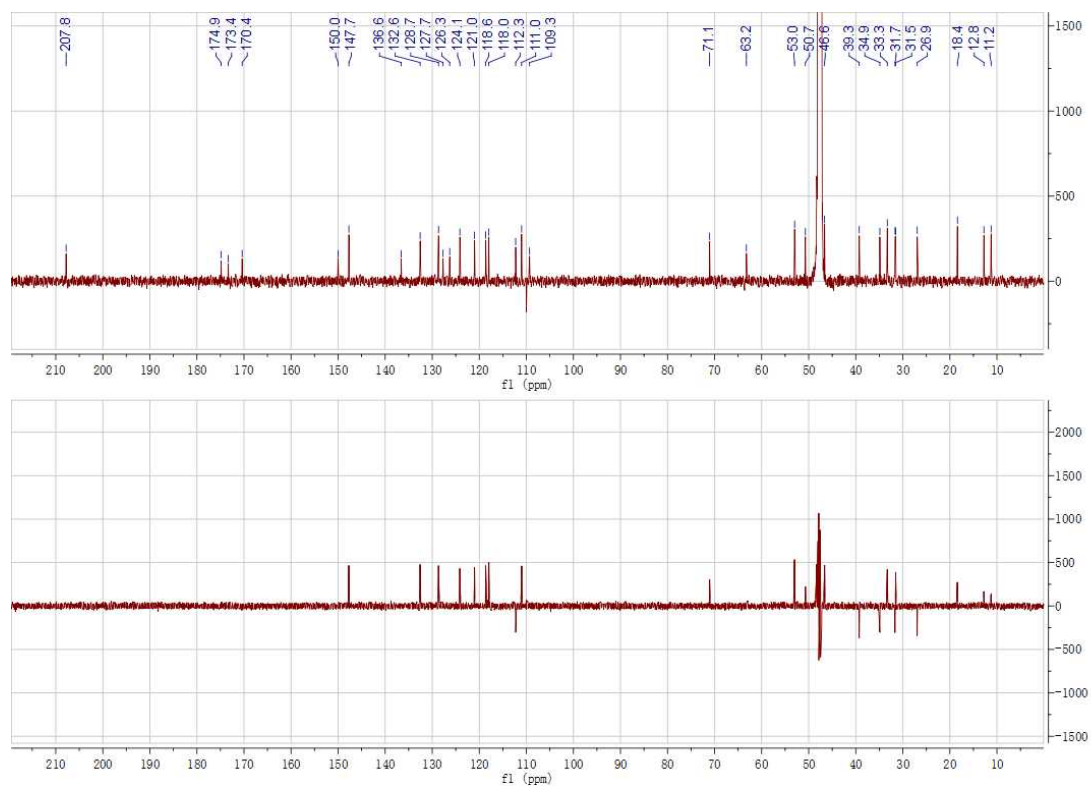

Figure S11.  $^{13}\text{C}$  NMR of compound **2** (in  $\text{CD}_3\text{OD}$ )

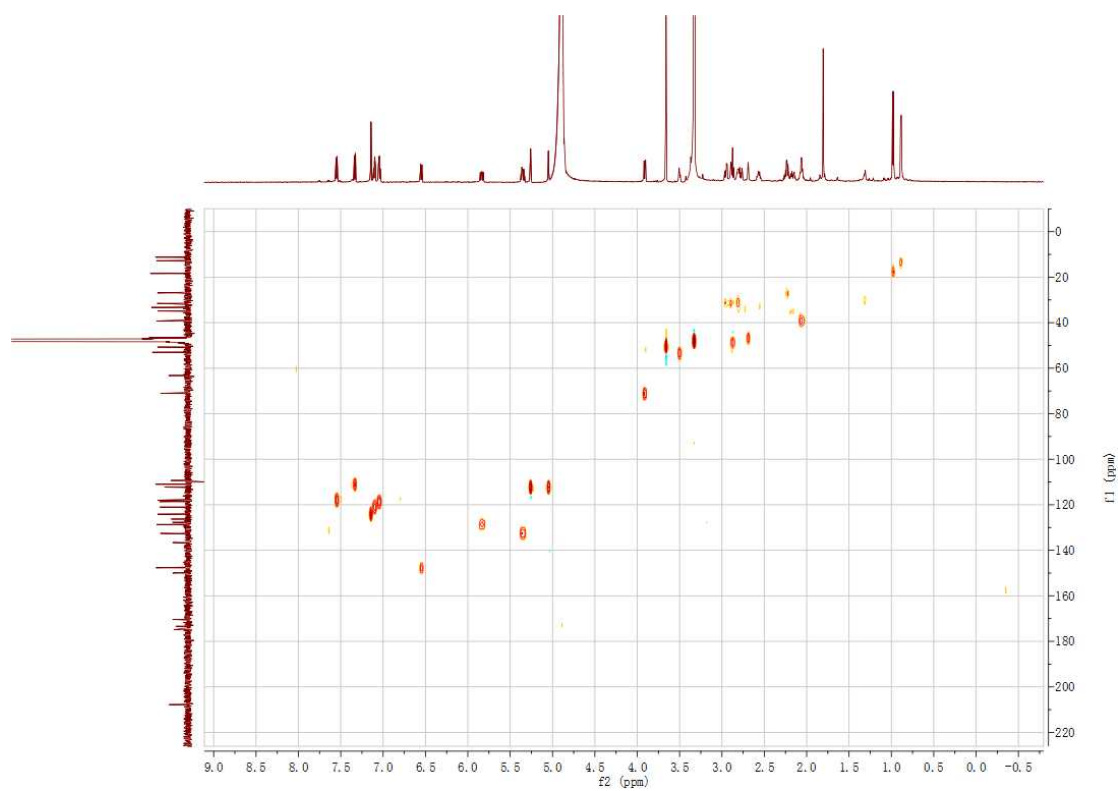

Figure S12. HSQC of compound **2** (in  $\text{CD}_3\text{OD}$ )

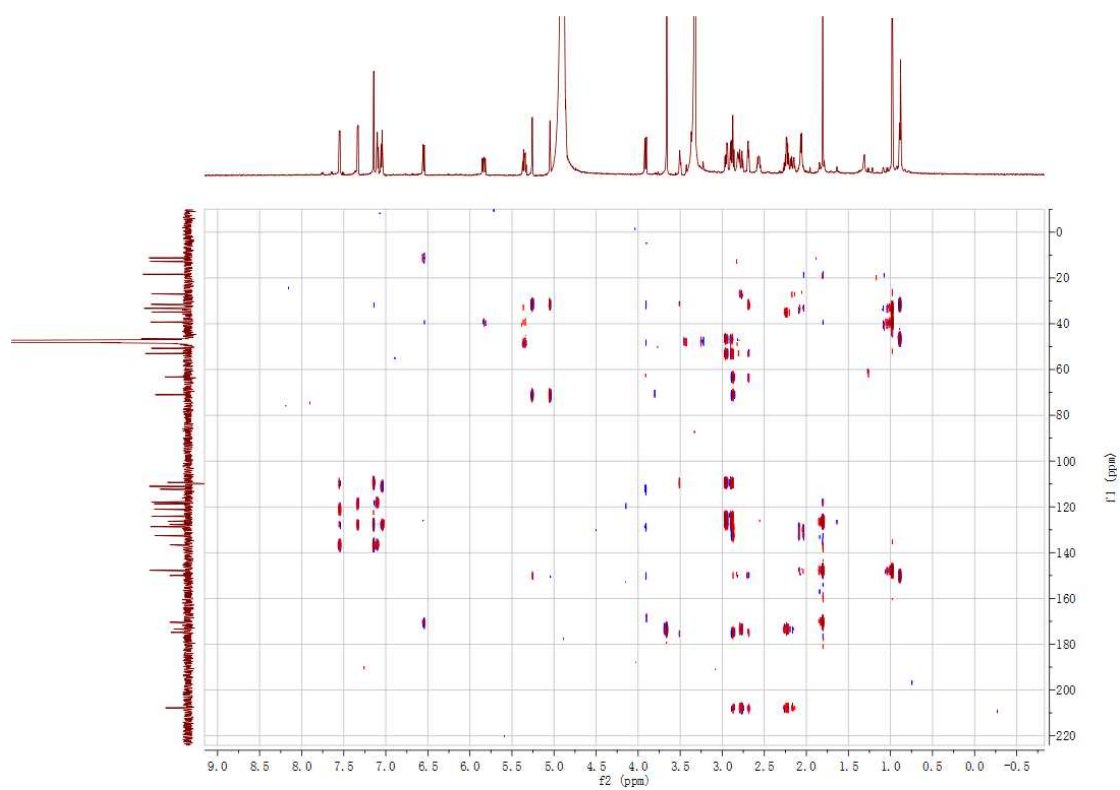

Figure S13. HMBC of compound **2** (in CD<sub>3</sub>OD)

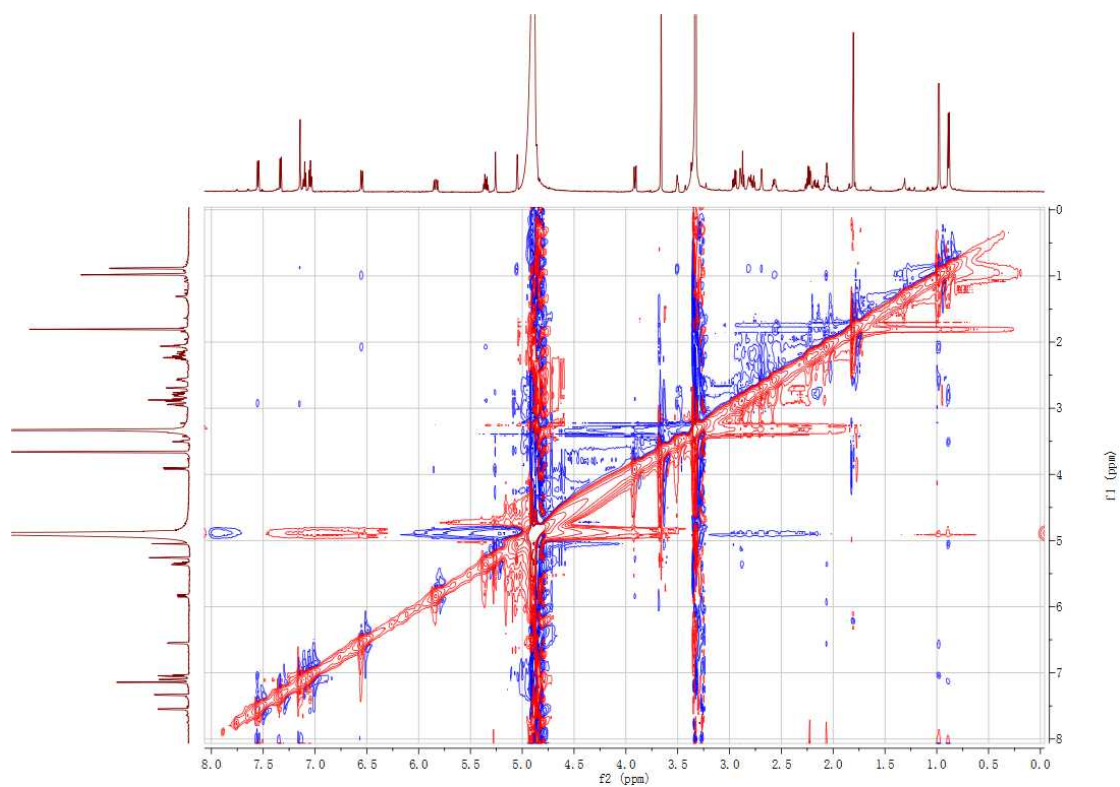

Figure S14. NOESY of compound **2** (in CD<sub>3</sub>OD)

# Mass Spectrum SmartFormula Report

**Analysis Info**  
 Analysis Name D:\Data\MS\data\202107\shaosurun\_LTH1-15-3\_pos\_52\_01\_11334.d  
 Method LC\_Direct Infusion\_pos\_70-500mz.m  
 Sample Name shaosurun\_LTH1-15-3\_pos  
 Comment  
 Acquisition Date 8/2/2021 3:04:33 PM  
 Operator SCSIO  
 Instrument maXis 255552.00029

**Acquisition Parameter**  
 Source Type ESI Ion Polarity Positive Set Nebulizer 0.4 Bar  
 Focus Active Set Capillary 4500 V Set Dry Heater 180 °C  
 Scan Begin 70 m/z Set End Plate Offset -500 V Set Dry Gas 4.0 l/min  
 Scan End 1500 m/z Set Charging Voltage 0 V Set Divert Valve Waste  
 Set Corona 0 nA Set APCI Heater 0 °C

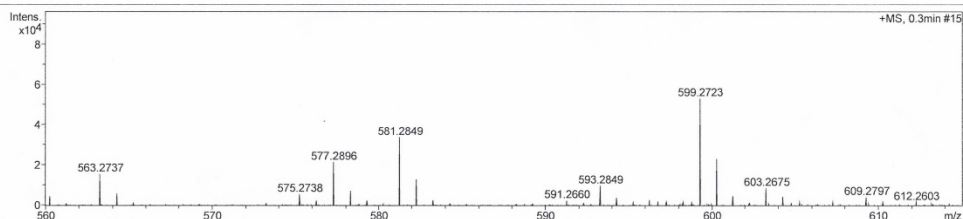

| Meas. m/z | # | Ion Formula   | Score  | m/z       | err [ppm] | err [mDa] | mSigma | rdB  | e <sup>-</sup> Conf | N-Rule |
|-----------|---|---------------|--------|-----------|-----------|-----------|--------|------|---------------------|--------|
| 577.2896  | 1 | C33H41N2O7    | 100.00 | 577.2908  | -2.1      | -1.2      | 24.0   | 14.5 | even                | ok     |
| 599.2723  | 1 | C33H40N2NaO7  | 100.00 | 599.2728  | 0.8       | 0.5       | 32.4   | 14.5 | even                | ok     |
| 1153.5709 | 1 | C66H81N4O14   | 100.00 | 1153.5744 | 3.0       | 3.5       | 558.7  | 28.5 | even                | ok     |
| 1175.5542 | 1 | C66H80N4NaO14 | 100.00 | 1175.5563 | 1.8       | 2.2       | 217.1  | 28.5 | even                | ok     |

shaosurun\_LTH1-15-3\_pos\_52\_01\_11334.d  
 Bruker Compass DataAnalysis 4.1

printed: 8/2/2021 3:14:45 PM

by: SCSIO

Page 1 of 1

Figure S15. HRESIMS of compound 2

# 光谱峰值检测报告

2021/07/02 16:51:27

数据集: LTH1-15-3 - RawData

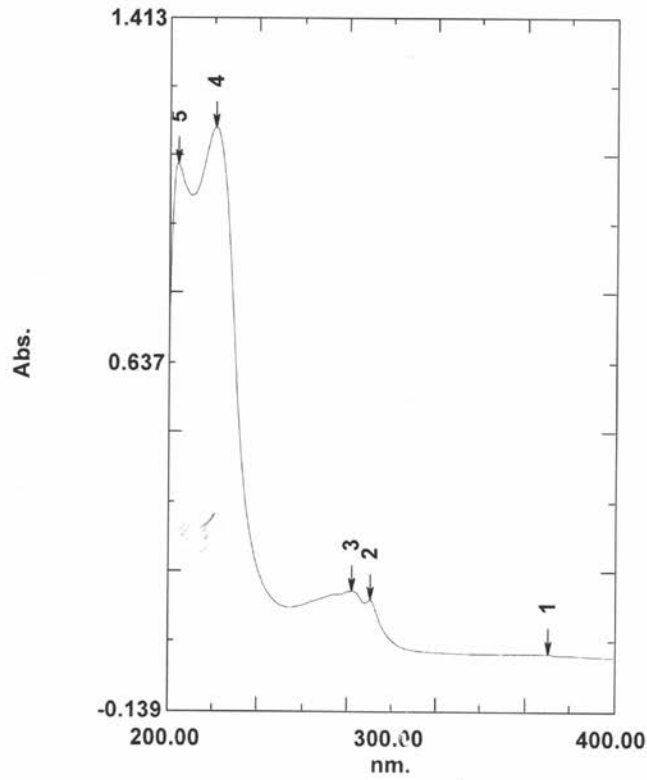

[测定属性]  
 波长范围(nm): 200.00 到 400.00  
 扫描速度: 中速  
 采样间隔: 0.2  
 自动采样间隔: 启用  
 扫描模式: 单个

[仪器属性]  
 仪器类型: UV-2600 系列  
 测定方式: 吸收值  
 狭缝宽: 2.0  
 积分时间: 0.1 秒  
 光源转换波长: 323.0 nm  
 检测器单元: 直接  
 S/R 转换: 标准  
 阶梯校正: OFF

[附件属性]  
 附件: 无

[数据处理参数]  
 阈值: 0.0010000  
 点: 4  
 内插: 停用  
 平均: 停用

[样品准备属性]  
 重量:  
 体积:  
 稀释:  
 光程长:  
 附加信息:

| No. | P/V | 波长(nm) | Abs.   | 描述 |
|-----|-----|--------|--------|----|
| 1   | ☉   | 370.80 | -0.013 |    |
| 2   | ☉   | 290.20 | 0.106  |    |
| 3   | ☉   | 282.20 | 0.126  |    |
| 4   | ☉   | 220.60 | 1.164  |    |
| 5   | ☉   | 203.60 | 1.082  |    |

Figure S16. UV of compound 2

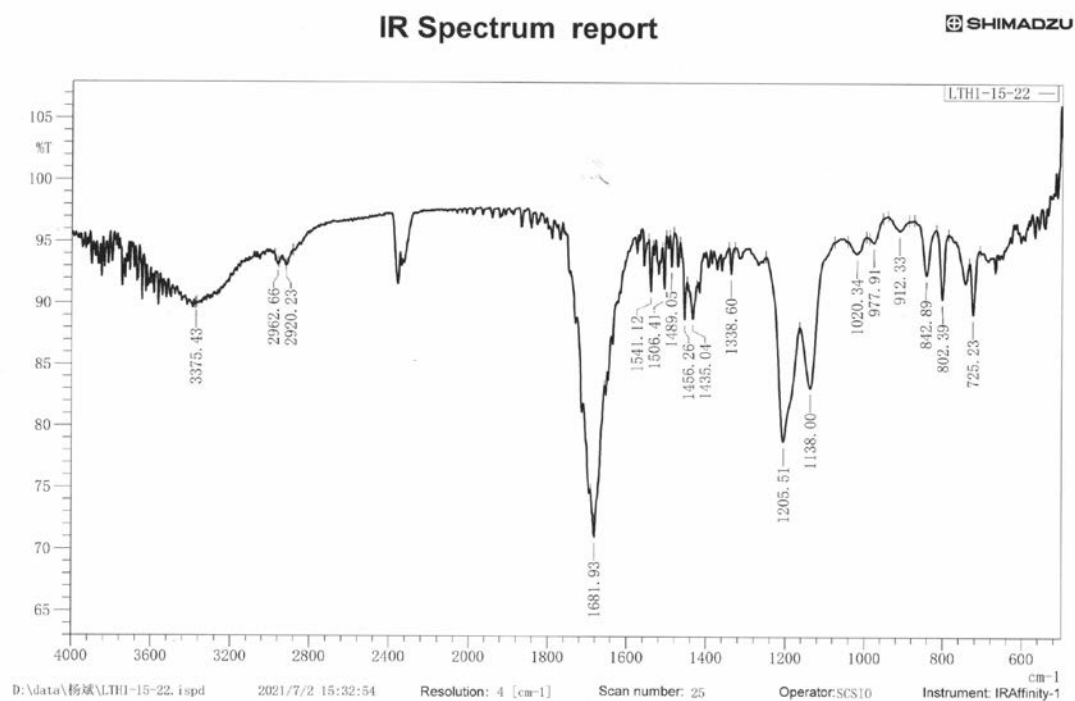

Figure S17. IR of compound **2**

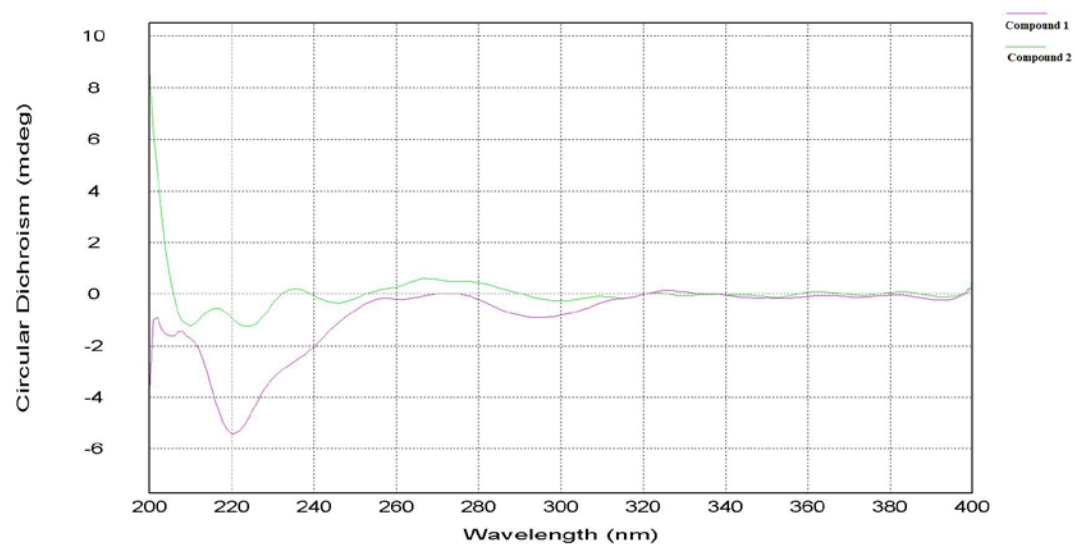

Figure S18. CD of compounds **1** and **2**

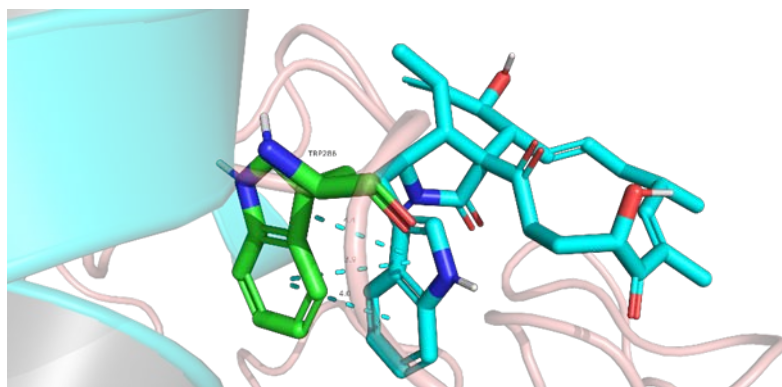

Figure S19. Molecular docking of chaetoglobosin Fex

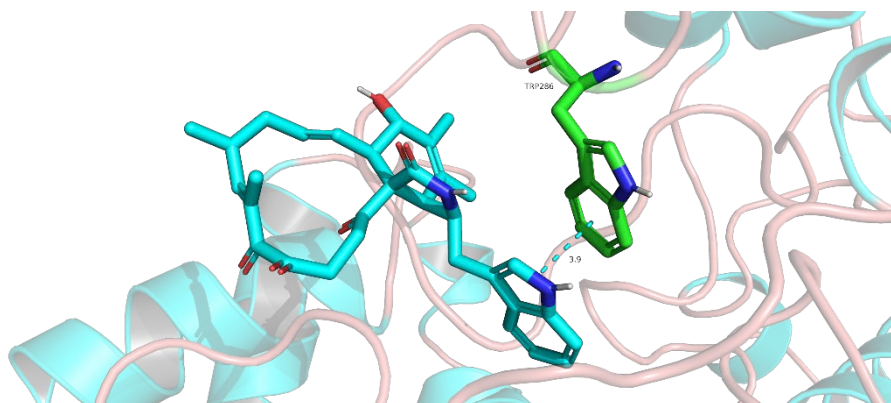

Figure S20. Molecular docking of chaetoglobosin G

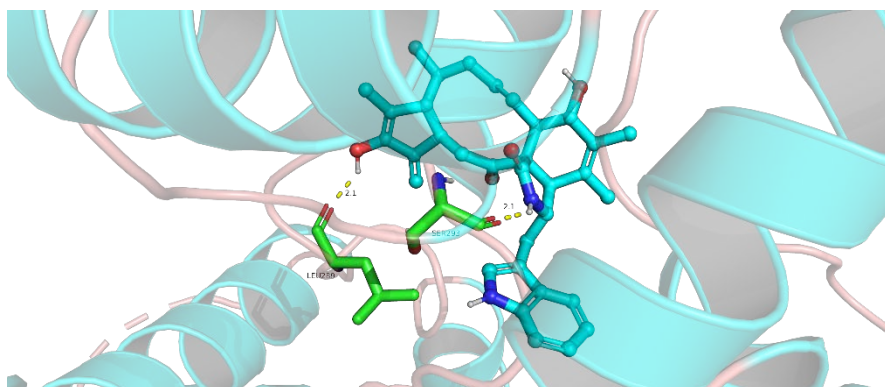

Figure S21. Molecular docking of chaetoglobosin Vb
